# Supplementary material for: Pulsed-waveform electrocatalytic detoxification of hexavalent chromium promoted by pseudocapacitive effects
Source: Royal Society of Chemistry journal article supplement (doi:10.1039/d2ta08916e), 2023-01-01
Supplement: d2ta08916e1.pdf [file d2ta08916e1.pdf]

1

## Supporting Information

2

3 **Pulsed-waveform Electrocatalytic Detoxification of Hexavalent**

4 **Chromium Promoted by Pseudocapacitive Effects**

5 *Huaijia Xin<sup>a</sup>, Hang Wang<sup>c</sup>, Wei Zhang<sup>a</sup>, Yang Liu<sup>a</sup>, Jun Zhang<sup>a</sup>, Gong Zhang<sup>a</sup>, Qinghua Ji<sup>a\*</sup>,*

6 *Huijuan Liu<sup>a</sup>, Jiuhui Qu<sup>a,b</sup>*

7

8 <sup>a</sup> Center for Water and Ecology, State Key Joint Laboratory of Environment Simulation and

9 Pollution Control, School of Environment, Tsinghua University, Beijing 100084, China

10 <sup>b</sup> Key Laboratory of Drinking Water Science and Technology Research Centre for Eco-

11 Environmental Sciences, Chinese Academy of Sciences, Beijing 100085, China

12 <sup>c</sup> Department of Chemical and Biomolecular Engineering, Tandon School of Engineering, New

13 York University, New York 11201, USA

14

15 \* Corresponding Author:

16 E-mail: [qhji@tsinghua.edu.cn](mailto:qhji@tsinghua.edu.cn); Phone: (8610)6279-0565; Fax: (8610)6292-3558.

17

18 This file contains: 14 pages; 17 figures.

19

## 20 ■ Experimental Section

21 **Preparation of Carbon-based Electrodes.** Carbon paper and the activated carbon  
22 power were supplied by Toray Industries, Inc and Shanghai Jiuding Chemical  
23 Technology Co., Ltd, respectively. The carbon paper electrode ( $2 \times 2 \text{ cm}^2$ ) was prepared  
24 by hydrothermally treating in  $\text{HNO}_3$  solution at  $80^\circ\text{C}$  for 2 h to obtain hydrophilic  
25 substrates. The activated carbon electrode was prepared by sticking the activated carbon  
26 powder (0.2 mg) onto the ITO substrate ( $2 \times 2 \text{ cm}^2$ ) with naphthol solution.

27 **Preparation of the Flow-through PANI Electrode.** The PANI was obtained by flow-  
28 through electrodeposition of aniline monomer on the 316L SS. The electrolyte was  
29 composed of 0.5 M aniline and 1 M  $\text{HClO}_4$ . Typically, IrTa electrodes were used as  
30 anode while 316L SS were used as cathode, which were separated by a porous  
31 insulating spacer. Ten pairs of SS and IrTa were stacked in a single flow-through cell,  
32 and the electrolyte was injected into the anodic end of the cell and flow through the SS  
33 electrodes at a flow rate of  $150 \text{ L/h/m}^2$  and finally out of the cell. The flow-through  
34 electrodeposition was carried out with a cell voltage of 1.8 V for 600 s. After  
35 polymerization, the as-prepared PANI electrodes were taken out and washed with the  
36 ultrapure water. Finally, the PANI electrode were freeze-dried for further application  
37 (Figure S16).

38 **Fabrication of the Flow-through Cell.** PANI supported on the SS ( $4 \times 5 \text{ cm}^2$ ) and the  
39 commercial iridium tantalum modified titanium mesh (IrTa,  $4 \times 5 \text{ cm}^2$ ) were used as  
40 the cathode and anode, respectively. Ten pairs of cathodes and anodes separated by  
41 porous insulating spacer were stacked and loaded into a flow-through cell (denoted as

42 the PANI/IrTa flow-through cell) (Figure 6a). Each pair of PANI and IrTa electrodes  
43 were connected in series. Stainless steel wires were used to connect all the PANI and  
44 IrTa, respectively, and then connected to the corresponding cathode and anode of the  
45 power supply.

46 **Flow-through Experiments.** All experiments were conducted in a two-electrode  
47 system with 10 ppm Cr(VI) (pH = 2). The influent was injected into the PANI/IrTa  
48 flow-through cell through an inlet by a peristaltic pump and the effluent was discharged  
49 through an outlet by a peristaltic pump as well. The retention time was 5 min or 10 min.  
50 Comparisons between the constant and pulsed voltages on the reduction efficiency of  
51 Cr(VI) were carried out with the cell voltages ranging from 1.0 to 1.6 V. The durability  
52 of the PANI flow-through electrode in electrocatalytic reduction of Cr(VI) under the  
53 pulsed voltage was also evaluated.

54

## 55 ■ Results and Discussion

56 **Characterization of the PANI Electrode.** The XPS widerange spectra show that the  
57 N content of PANI film and PANI nanoarray were 8.1% and 7.4%, respectively (Figure  
58 S3a). High-resolution N 1s spectra demonstrate that the N functional groups were  
59 divided into three fitted peaks centered at 398.3, 399.9 and 401.9 eV, which represent  
60 the quinoid amine (=N<sup>-</sup>), benzenoid amine (-NH<sup>-</sup>), and the nitrogen cationic radical  
61 (N<sup>+•</sup>), respectively (Figure S3b).<sup>1,2</sup> The area fraction of the protonated nitrogen atoms  
62 indicates the doping level of the PANI film and PANI nanoarray were 15.7% and 8.3%,  
63 respectively. In the FT-IR spectra, four typical bands corresponding to the PANI

64 appeared at 1143, 1307, 1495 and 1581  $\text{cm}^{-1}$ , corresponding to the aromatic C–H in-  
 65 plane bending, C–N stretching of secondary aromatic amine, and the C=C stretching  
 66 vibrations of benzenoid and quinoid ring structure (Figure S3c).<sup>1-3</sup> The relative strength  
 67 of peak intensities between quinoid ring (1581  $\text{cm}^{-1}$ ) and benzenoid ring (1495  $\text{cm}^{-1}$ )  
 68 was related to the extent of oxidation,<sup>2</sup> and the relative absorption intensities at 1142.7  
 69  $\text{cm}^{-1}$  corresponded to the extent of protonation,<sup>4</sup> which were similar both in the PANI  
 70 film and PANI nanoarray. Complementary structure information was provided by  
 71 Raman spectra (Figure S3d), which were detailed describe in the section of *in situ*  
 72 Raman Spectroscopy.

73

74 **In situ Raman Spectroscopy Confirmed that PANI Reduced Cr(VI) during the**  
 75 **Off-voltage Time**

76 The oxidation reactions associated with LB/ES and ES/PB conversions:

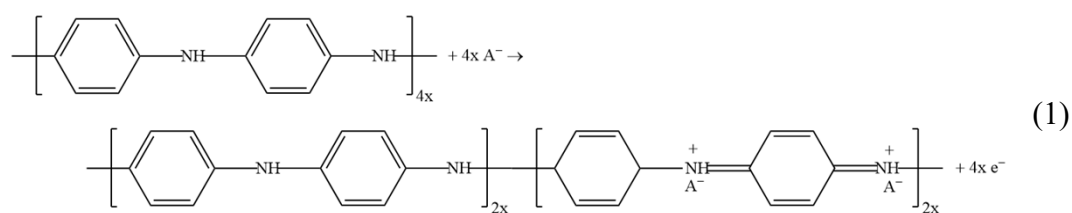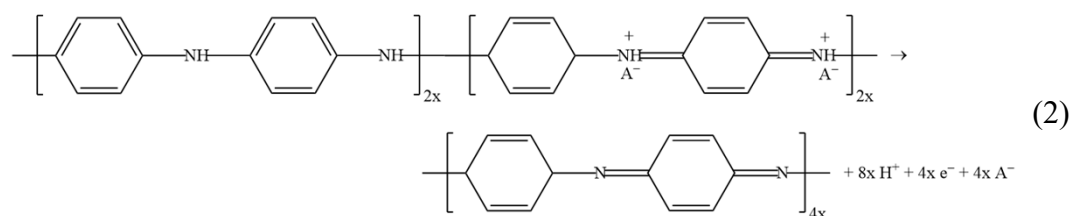

77

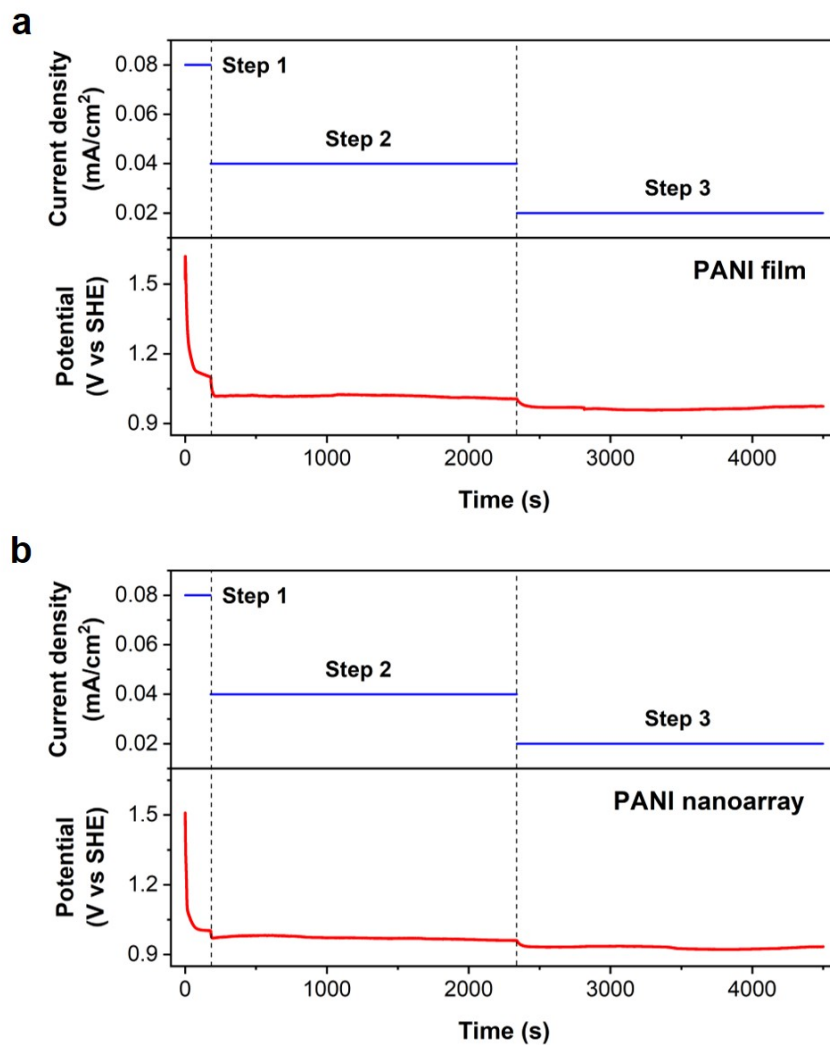

78

79

**Figure S1.** The potential variation during the galvanostatic procedure for the electrodeposition of (a) PANI film and (b) PANI nanoarray supported on ITO

80

substrates

81

82

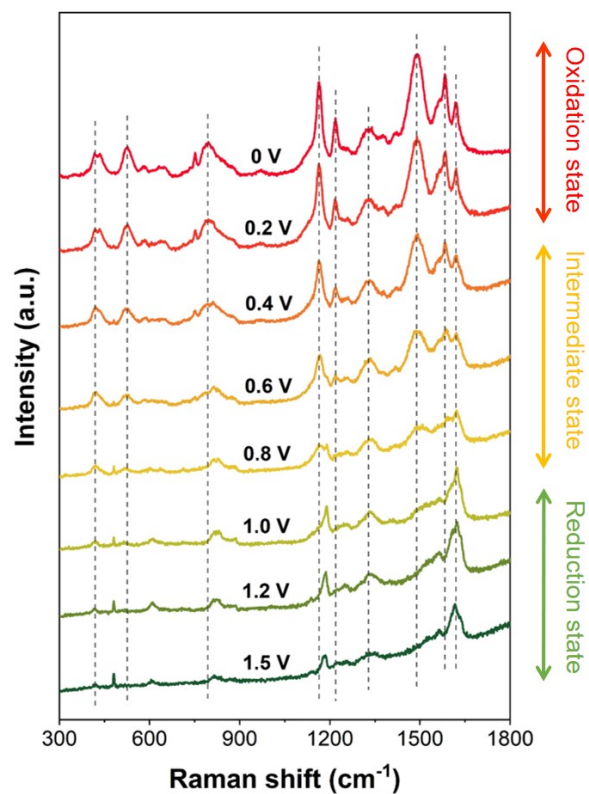

83

84 **Figure S2.** Raman spectra of PANI in 10 ppm Cr(VI) at different constant voltages.

85

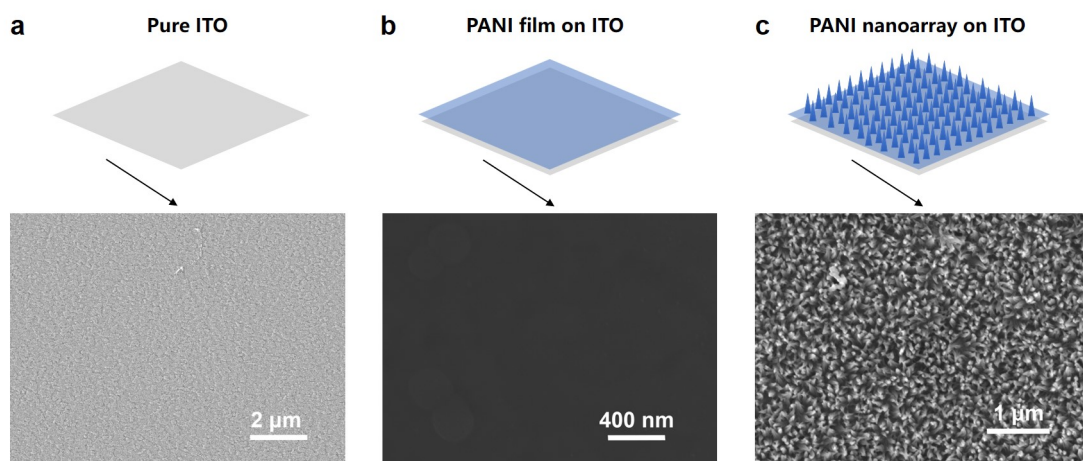

86

87 **Figure S3.** SEM images of (a) ITO substrate, (b) PANI film and (c) PANI nanoarray

88

supported on the ITO.

89

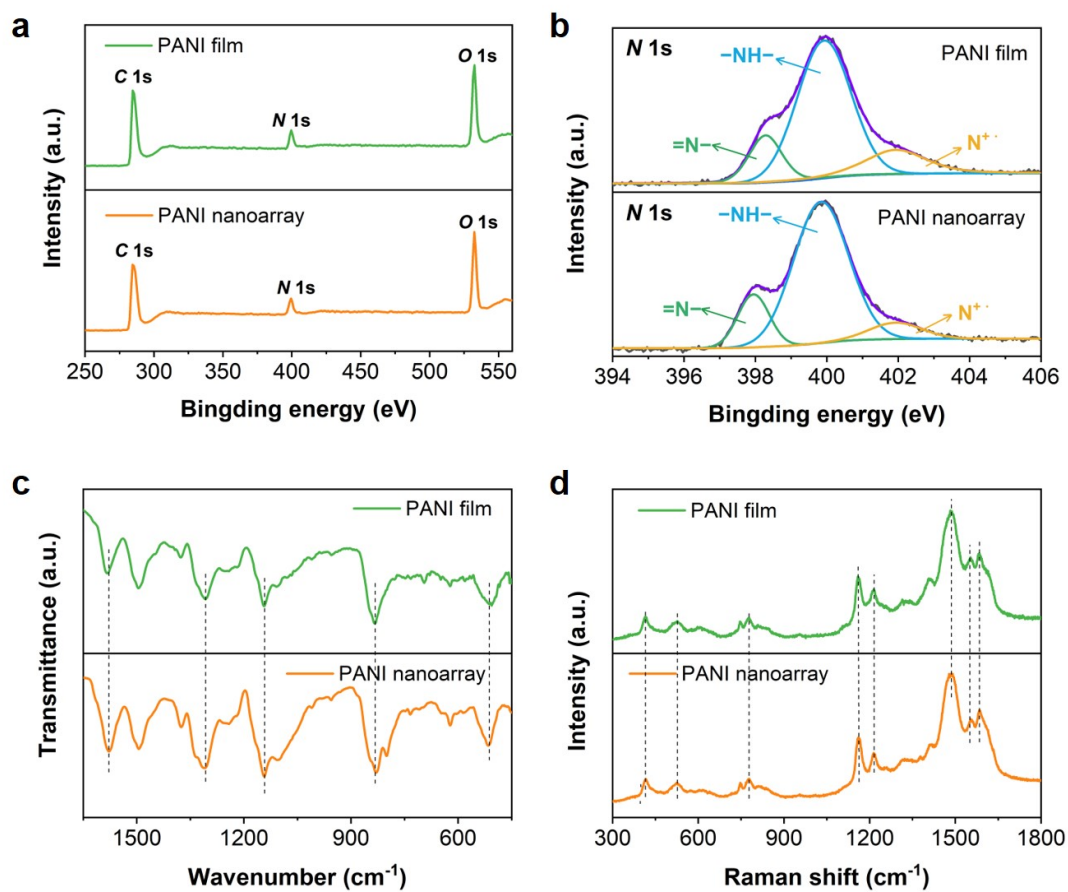

90

91 **Figure S4.** PANI electrode characterization. (a) XPS (b) XPS *N* 1s, (c) FT-IR, and (f)

92

Raman spectra.

93

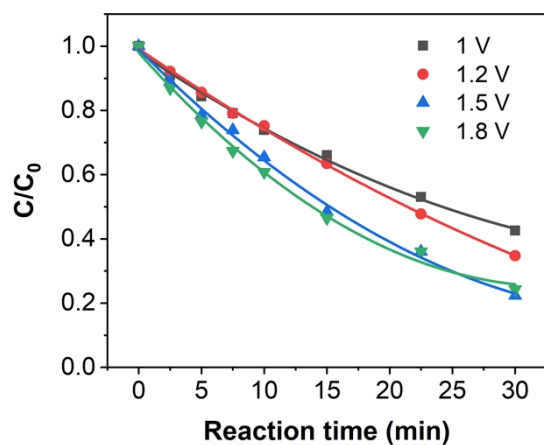

94

95 **Figure S5.** Effect of cell voltages on Cr(VI) reduction. Experiments were conducted

96 at various pulsed voltages (0.2 Hz,  $t_{\text{on}} = t_{\text{off}}$ ). Initial [Cr(VI)] = 10 ppm and pH = 2.

97

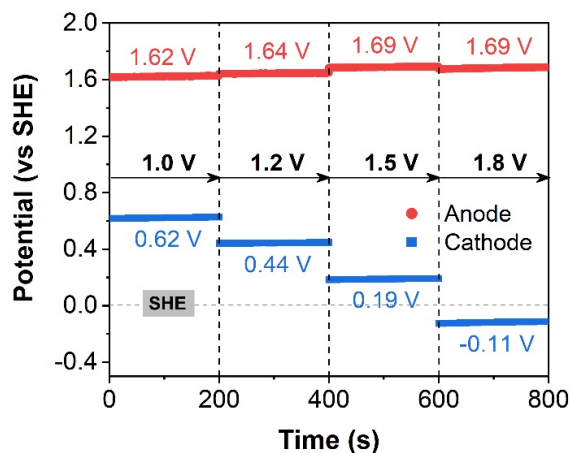

98

99 **Figure S6.** The anode and cathode potentials at different cell voltages. Initial [Cr(VI)]

100 = 10 ppm and pH = 2. SHE: standard hydrogen electrode.

101

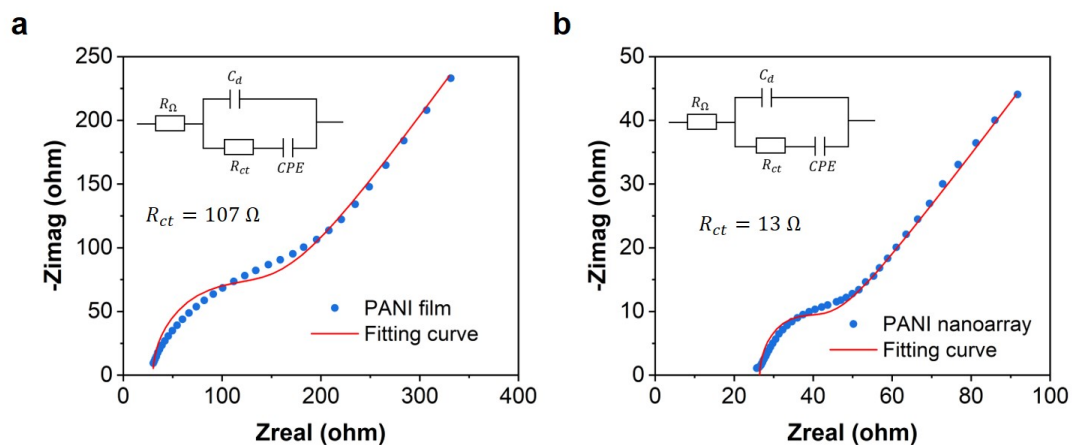

102

103 **Figure S7.** EIS curves for (a) PANI film and (b) PANI nanoarray.

104

105 **Table S1.** Parameters of the electrical equivalent circuit of EIS analysis

| Electrode      | $R_{\Omega}$ (Ohm) | $C_d$ (F)            | $R_{ct}$ (Ohm) | $Q$ ( $F \cdot s^{-(\alpha-1)}$ ) | $\omega$ ( $^{\circ}$ ) | $\alpha$ (1) |
|----------------|--------------------|----------------------|----------------|-----------------------------------|-------------------------|--------------|
| PANI film      | 30                 | $2.9 \times 10^{-7}$ | 107            | $1.35 \times 10^{-4}$             | 47.7                    | 0.53         |
| PANI nanoarray | 26.5               | $2.4 \times 10^{-5}$ | 13             | $6.5 \times 10^{-3}$              | 39.6                    | 0.44         |

106



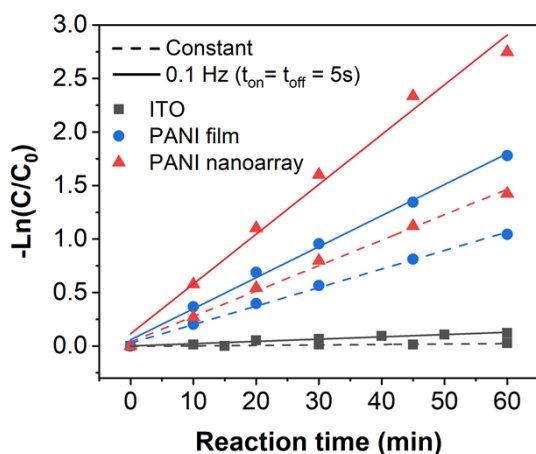

107

108 **Figure S8.** Kinetics investigation of Cr(VI) reduction with different cathodes at the

109 constant and pulsed voltages of 1.5 V. Initial [Cr(VI)] = 10 ppm and pH = 2.

110

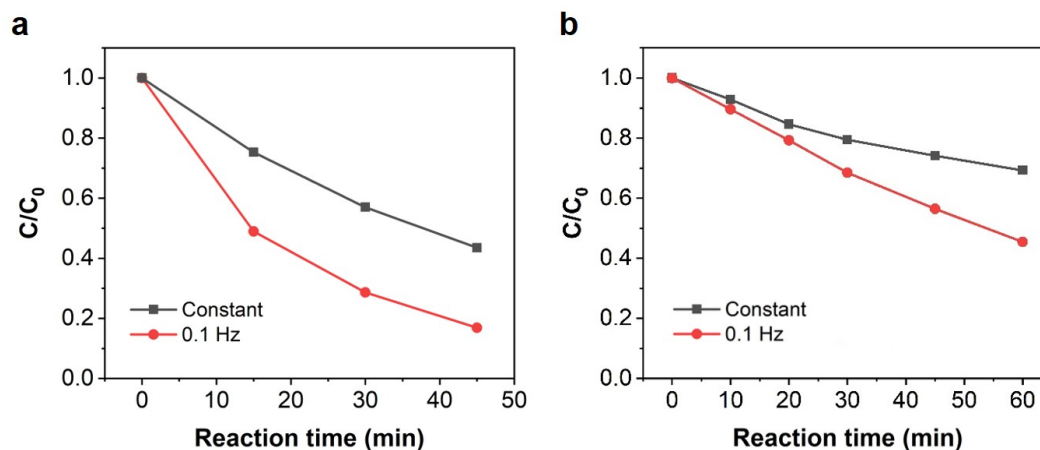

111

112 **Figure S9.** Cr(VI) reduction efficiency at the constant and pulsed voltages of 1.5 V:

113 (a) carbon paper electrode and (b) activated carbon electrode. Initial [Cr(VI)] = 10

114

ppm and pH = 2.

115

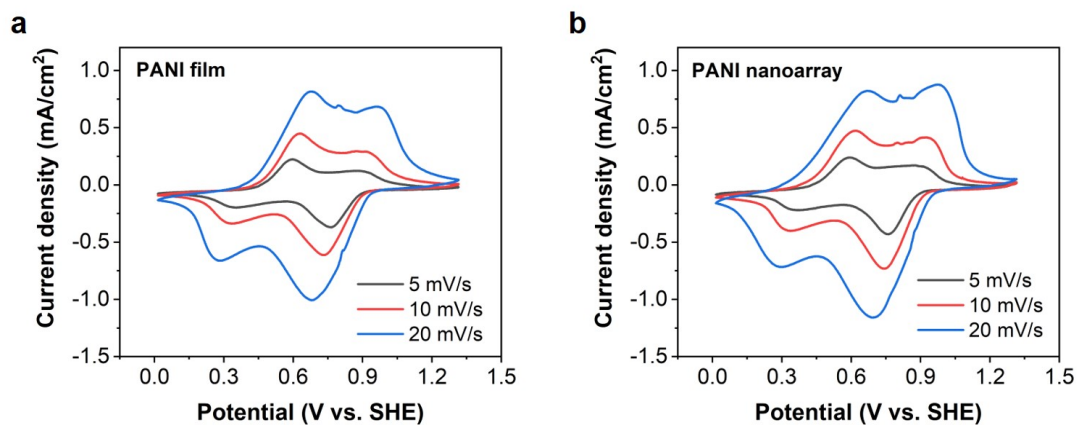

116

117 **Figure S10.** Cyclic voltammetry at different scan rates: (a) PANI film and (b) PANI

118

nanoarray.

119

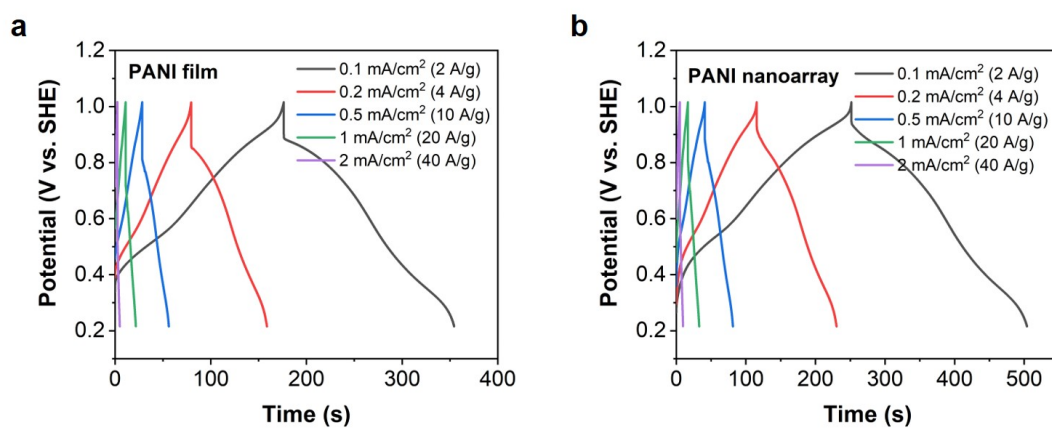

120

121 **Figure S11.** Typical galvanostatic charge–discharge curves at several current

122

densities: (a) PANI film and (b) PANI nanoarray.

123

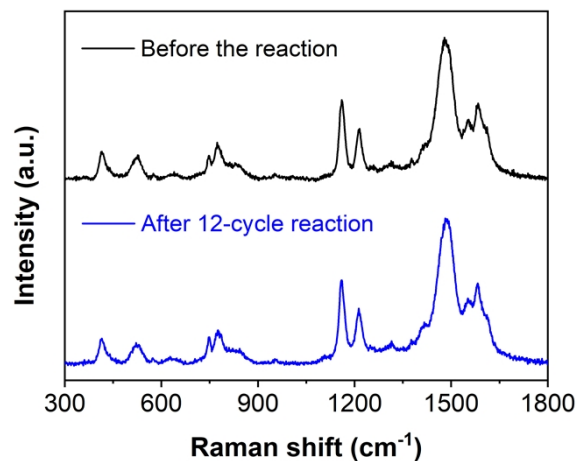

124

125 **Figure S12.** Raman spectra of the PANI nanoarray before and after 12-cycle reaction.

126

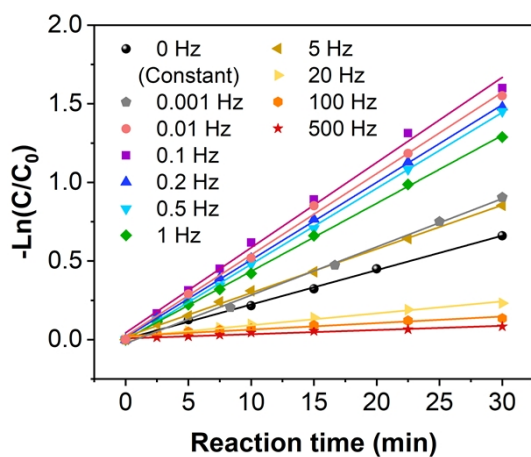

127

128 **Figure S13.** Kinetics investigation of Cr(VI) reduction at a pulsed voltage of 1.5 V

129 with the frequencies of 0 (constant) to 500 Hz and the on-off ratio of 50%. The PANI

130 nanoarray served as the cathode. Initial [Cr(VI)] = 10 ppm and pH = 2.

131

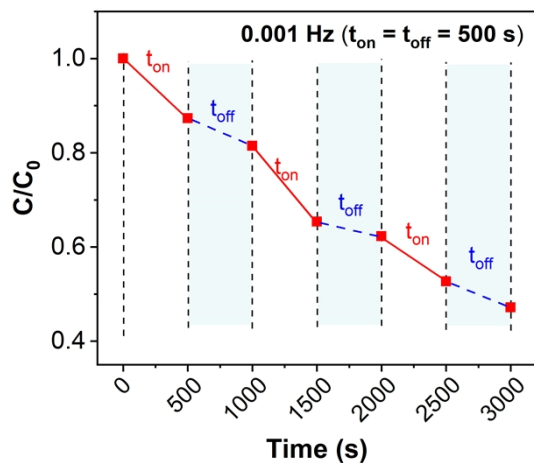

132

133 **Figure S14.** Cr(VI) reduction efficiency at  $t_{\text{on}}$  and  $t_{\text{off}}$  under 0.001 Hz pulsed voltage

134

of 1.5 V. Initial [Cr(VI)] = 10 ppm and pH = 2.

135

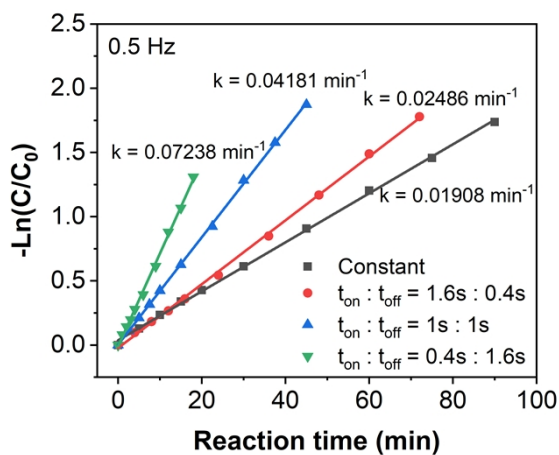

136

137 **Figure S15.** Influence of the on-off ratios on Cr(VI) reduction kinetics at the pulsed

138 voltage of 1.5 V with the frequency of 0.2 Hz. The PANI nanoarray served as the

139

cathode. Initial [Cr(VI)] = 10 ppm and pH = 2.

140

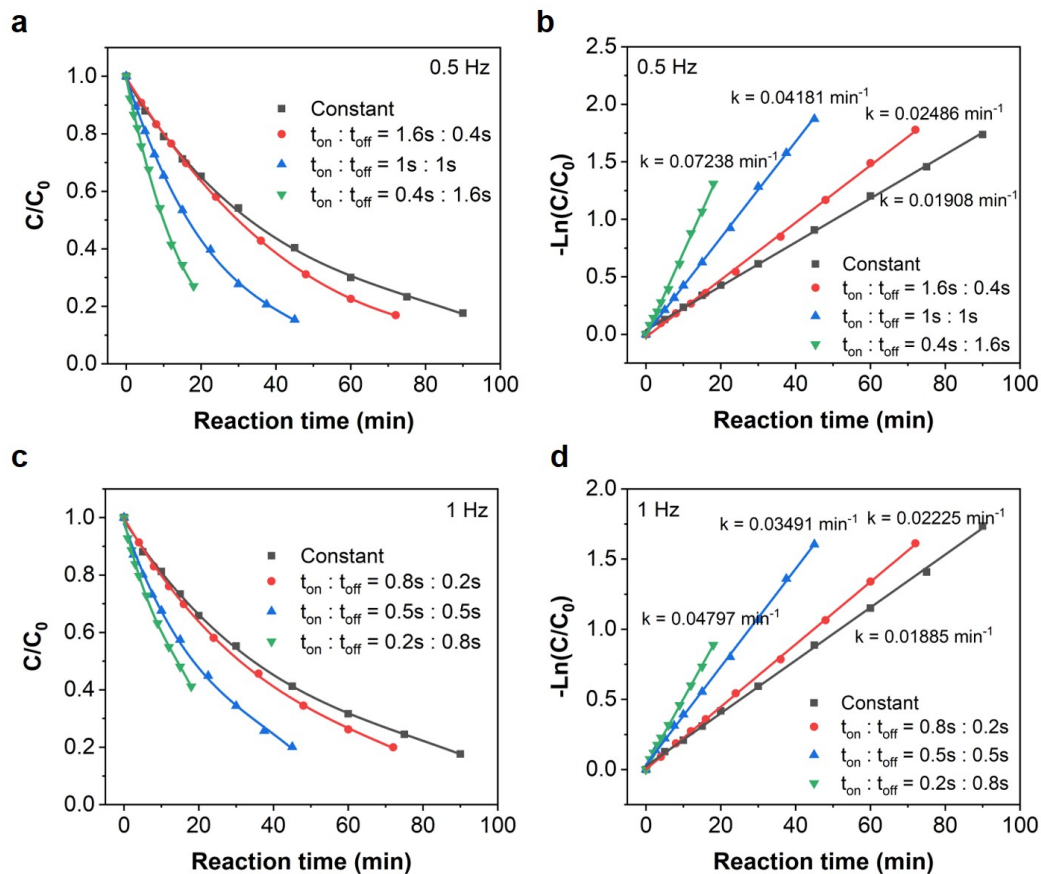

141

142 **Figure S16.** Influence of the on-off ratios on Cr(VI) reduction kinetics at the pulsed

143 voltage of 1.5 V with the frequency of (a–b) 0.5 Hz and (c–d) 1 Hz. The PANI

144 nanoarray served as the cathode. Initial [Cr(VI)] = 10 ppm and pH = 2.

145

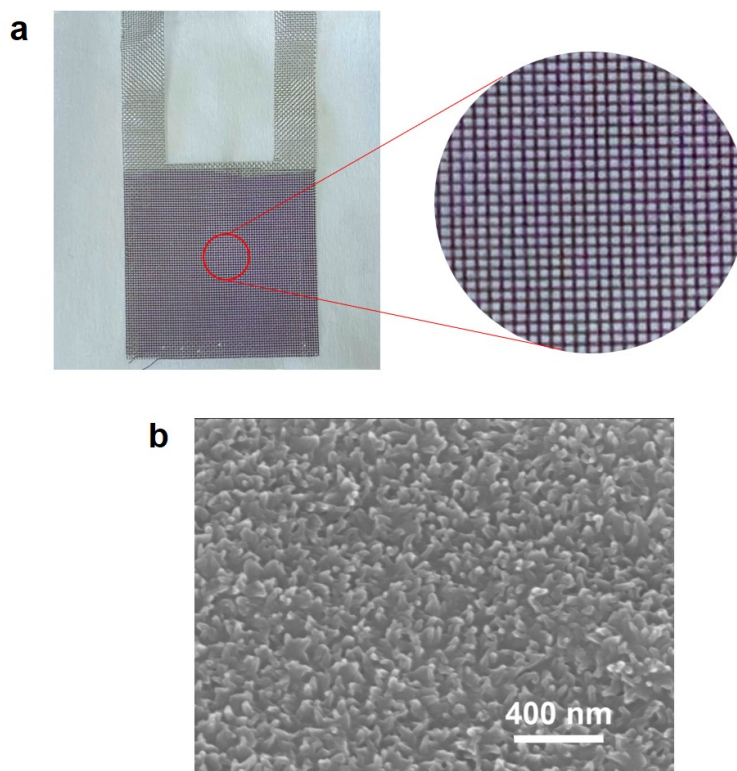

146

147 **Figure S17.** (a) Photograph and (b) SEM images of the PANI supported on the SS.

148

149

## 150 **References**

151 1. Y. Yang, M. h. Diao, M. m. Gao, X. f. Sun, X. w. Liu, G. h. Zhang, Z. Qi and S.  
152 g. Wang, *Electrochimica Acta*, 2014, **132**, 496-503.

153 2. Z. Tong, Y. Yang, J. Wang, J. Zhao, B.-L. Su and Y. Li, *J. Mater. Chem. A*, 2014,  
154 **2**, 4642-4651.

155 3. X. Xiong, Q. Qiao, Q. Zhou, X. Cheng, L. Liu, L. Fu, Y. Chen, B. Wang, X. Wu  
156 and Y. Wu, *Nano Research*, 2023, DOI: 10.1007/s12274-022-5370-7.

157 4. H. V. Dias, X. Wang, R. M. Rajapakse and R. L. Elsenbaumer, *Chem. Commun.*,  
158 2006, DOI: 10.1039/b513938d, 976-978.

159
